## High expression of *dedicator of cytokinesis 1 (DOCK1)* confers poor prognosis in acute myeloid leukemia

Sze-Hwei Lee<sup>1,\*</sup>, Yu-Chiao Chiu<sup>2,\*</sup>, Yi-Hung Li<sup>1</sup>, Chien-Chin Lin<sup>1,3</sup>, Hsin-An Hou<sup>1</sup>, Wen-Chien Chou<sup>1,3</sup> and Hwei-Fang Tien<sup>1</sup>

<sup>1</sup>Division of Hematology, Department of Internal Medicine, National Taiwan University Hospital, Taipei, Taiwan

<sup>2</sup>Graduate Institute of Biomedical Electronics and Bioinformatics, National Taiwan University, Taipei, Taiwan

<sup>3</sup>Department of Laboratory Medicine, National Taiwan University Hospital, Taipei, Taiwan

\*These authors have contributed equally to this work

Correspondence to: Wen-Chien Chou, email: wchou@ntu.edu.tw  
Hwei-Fang Tien, email: hftien@ntu.edu.tw

Keywords: *DOCK1*, acute myeloid leukemia, prognosis, stemness, cell migration

Received: April 25, 2017

Accepted: June 29, 2017

Published: July 31, 2017

Copyright: Lee et al. This is an open-access article distributed under the terms of the Creative Commons Attribution License 3.0 (CC BY 3.0), which permits unrestricted use, distribution, and reproduction in any medium, provided the original author and source are credited.

### ABSTRACT

***DOCK* family genes encode evolutionarily conserved guanine nucleotide exchange factors for Rho GTPase involving multiple biological functions. Yet the patterns and prognostic significance of their expression in acute myeloid leukemia (AML) remain unexplored. Here we analyzed the expression patterns of 11 *DOCK* family genes in AML cells based on the array data of 347 patients from our cohort and several other published datasets. We further focused on the implications of the expression of *DOCK1* since it was the only one in *DOCK* family to be associated with survival. Physiological functions and biological pathways associated with *DOCK1* were identified using bioinformatics approaches. With a median follow up of 57 months, higher *DOCK1* expression was associated with shorter disease free and overall survival. The finding could be validated by two independent cohorts. Multivariate analysis showed higher *DOCK1* expression as a strong independent unfavorable prognostic factor. Higher *DOCK1* expression was closely associated with older age, higher platelet and peripheral blast counts, intermediate-risk cytogenetics, *FLT3-ITD*, *MLL-PTD* and mutations in *PTPN11*, *NPM1*, *RUNX1*, *ASXL1* and *DNMT3A*. Functional enrichment analysis suggested the association of *DOCK1* overexpression with several key physiological pathways including cell proliferation, motility, and chemotaxis. Therefore, we suggested that AML with higher *DOCK1* expression showed characteristic clinical and biological features. *DOCK1* expression is an important prognostic marker and a potential therapeutic target for the treatment of AML. Studies in large prospective cohorts are necessary to confirm our findings. Further mechanistic studies to delineate the role of *DOCK1* in the leukemogenesis are warranted.**

### INTRODUCTION

The Dedicator of cytokinesis (*DOCK*) family protein is a novel class of guanine nucleotide exchange factors (GEF) for Rac GTPases of the Rho family, [1] and is known to be involved in the regulation of actin cytoskeleton, cell motility, [2] as well as cell cycle, survival, gene expression, and tumorigenesis [1].

There are 11 *DOCK* proteins (*DOCK1* to *DOCK11*) in mammals, which are further classified into four subgroups (denoted as A to D) according to the sequence similarity and domain organization. The proteins in *DOCK-A* and *B* subgroups contain a terminal domain that allows binding of the adaptor protein *ELMO* (Engulfment and Motility) to promote efficient GEF activity [2]. Knocking down *ELMO1* impairs long-term expansion of leukemic

cell lines and depletion of *ELMO1* in human CD34<sup>+</sup> cells inhibit proliferation, possibly through the inhibition of ELMO-Rac axis [3]. The DOCK proteins are involved in several diseases including cancers, and disorders in the immune and central nervous systems [1]. Among them, DOCK2 plays a pivotal role in lymphocyte migration and activation as well as differentiation of T cells. A recent study identified DOCK2 as one of the FLT3 interacting protein [4]. DOCK4 participates in erythroid maturation [5]. The only known function of DOCK5 so far is the connection with osteoclasts [6]. Deletion of DOCK8 in human results in a combined immune deficiency syndrome [7]. Deregulation of the remaining DOCK proteins may contribute to neurodegenerative diseases and central nervous system defects [8]. As a prototype member in DOCK family, DOCK1 is involved in migration and invasion of various cancer cells including breast cancer, ovarian cancer and glioblastoma multiforme [9–11]. Despite the protean functions of DOCK proteins in cancers and hematopoiesis, their roles in acute myeloid leukemia (AML) have not been explored. In this study, we first screened the expression levels of DOCK family genes in a cohort of AML patients. The members with at least modest expression in AML were selected to test their prognostic significance in ours and the other two independent cohorts. We found that expression level of *DOCK1* but not the other members harbored prominent prognostic significance in both ours and other independent cohorts of AML patients. Higher expression of *DOCK1* served as an independent unfavorable prognostic marker. The prediction power of this single gene expression even outperformed several published gene signatures in AML prognostication. Bioinformatics analyses were performed to identify potential pathway and function of *DOCK1* in AML.

## RESULTS

### Expression of DOCK family members in AML

To obtain a comprehensive expression landscape of DOCK family genes in hematopoietic system, we profiled gene expression microarrays of the 347 AML samples (NTUH cohort) and reprocessed several public expression datasets of AML and/or normal samples. In the TCGA RNA-Seq data of AML patients (n=179), expression levels of DOCK genes were quite diverse (Figure 1A). *DOCK2* and *DOCK8* were among the top 10% of genome-wide genes (median RPKM, 60.8 and 50.3), while *DOCK3*, *DOCK4*, *DOCK6*, and *DOCK9* seemed silent (all median RPKM values <2), and *DOCK5*, *DOCK10*, and *DOCK11* showed modest expression. *DOCK1* had low but measurable expression levels among the AML patients. To investigate the involvement of DOCK genes in hematopoiesis, we analyzed another microarray dataset of samples across various hematopoietic cell stages (GSE24759, n=211). *DOCK1* seemed to be exclusively abundant in hematopoietic stem cells (HSC) (average z-value=1.17; one-sample t-test p<0.001; Figure 1B). In erythroid cells, expression levels of *DOCK2* and *DOCK10* were especially low (average z, -1.53 and -1.36; both p<0.001). *DOCK3*, *DOCK9*, and *DOCK10* formed a cluster of high expression in T cells (all p<0.001; Figure 1B).

### The prognostic significance of gene expression of DOCK family members in AML

Among the 347 AML patients in the NTUH cohort, 227 who received standard chemotherapy were dichotomized into two groups by the median expression

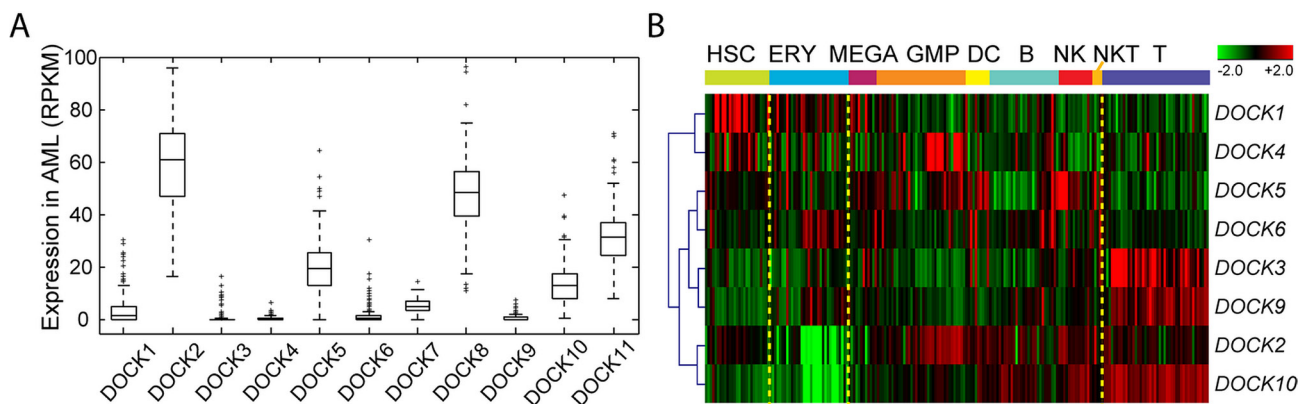

**Figure 1: Expression profile of DOCK family genes in AML and normal samples.** (A) Expression levels of DOCK family genes in AML. Samples of 179 AML patients were profiled with Illumina RNA-Seq by TCGA. RPKM, reads per kilobase of transcript per million mapped reads. (B) Heatmap of DOCK genes across hematopoietic cell states in GSE24759 (n=211). Expression levels were z-transformed in each probe, and multiple probes representing the same gene were averaged. Genes were clustered using hierarchical clustering. Abbreviations, hematopoietic stem cells (HSC), erythroid cells (ERY), megakaryocytes (MEGA), granulocyte/monocyte progenitors (GMP), dendritic cells (DC), B cells (B), natural killer cells (NK), natural killer T cells (NKT), and T cells (T).

levels of individual *DOCK* members according to the array data. With a median follow up of 57 months, we observed that a higher *DOCK1* expression level was associated with worse OS (median 20 vs. 116.8 months,  $p<0.001$ ) and DFS (median 11.0 vs. 101.7 months,  $p<0.001$ ) (Figure 2A and 2B). Convincingly, these observations could be validated by two independent cohorts TCGA (N=186) and GSE12417 (N=162) (Figure 2C and 2D). The similar prognostic impact of *DOCK1* expression was also present in the patients with AML other than acute promyelocytic leukemia (Figure 2E) as well as cytogenetically normal AML (Figure 2F) in our cohort. Overall, these data confirmed that *DOCK1* expression levels harbored a significant impact on survival in AML patients. On the contrary, higher expression of *DOCK2* was associated with a favorable outcome in our patients (median OS 68.0 months vs. 24.9 months,  $p=0.020$ ), however, this result was not able to be validated by TCGA or GSE12417 cohort (Supplementary Figure 1). The expression of other *DOCK* genes failed to demonstrate impacts on survival in our AML patients. We thus focused on *DOCK1* gene expression in subsequent analyses.

For the 227 patients who received standard chemotherapy, 61% of those with higher *DOCK1* levels achieved complete remission (CR), compared to

84% in the lower expression group ( $p<0.001$ , Table 1). Univariate Cox analysis revealed that higher *DOCK1* expression ( $p<0.001$ ), unfavorable karyotype ( $p=0.001$ ), older age ( $p=0.003$ ), higher WBC count ( $p=0.015$ ), CD 34 expression ( $p=0.018$ ), *FLT3*-ITD ( $p=0.001$ ), *MLL*-PTD ( $p=0.001$ ), and mutations in *TP53* ( $p<0.001$ ), *RUNX1* ( $p=0.040$ ) and *WT1* ( $p=0.020$ ) were all associated with shorter OS (Supplementary Table 1) while similar parameters, except *WT1* and *DNMT3A* mutations, adversely affected DFS (Supplementary Table 2). Presence of *CEBPA* double mutations correlated with better OS and DFS. Multivariate analysis confirmed higher *DOCK1* expression, along with older age, higher WBC count, unfavorable karyotype, absence of *CEBPA* double mutations and *TP53* mutation, as an independent unfavorable prognostic factor for both overall survival and disease free survival,  $p=0.005$  (Table 2) and  $p<0.001$  (Supplementary Table 3) respectively.

### Association of expression levels of *DOCK1* with clinical and biological parameters

Patient with higher *DOCK1* expression were older ( $p=0.010$ ) and had higher platelet ( $p<0.001$ ) and peripheral

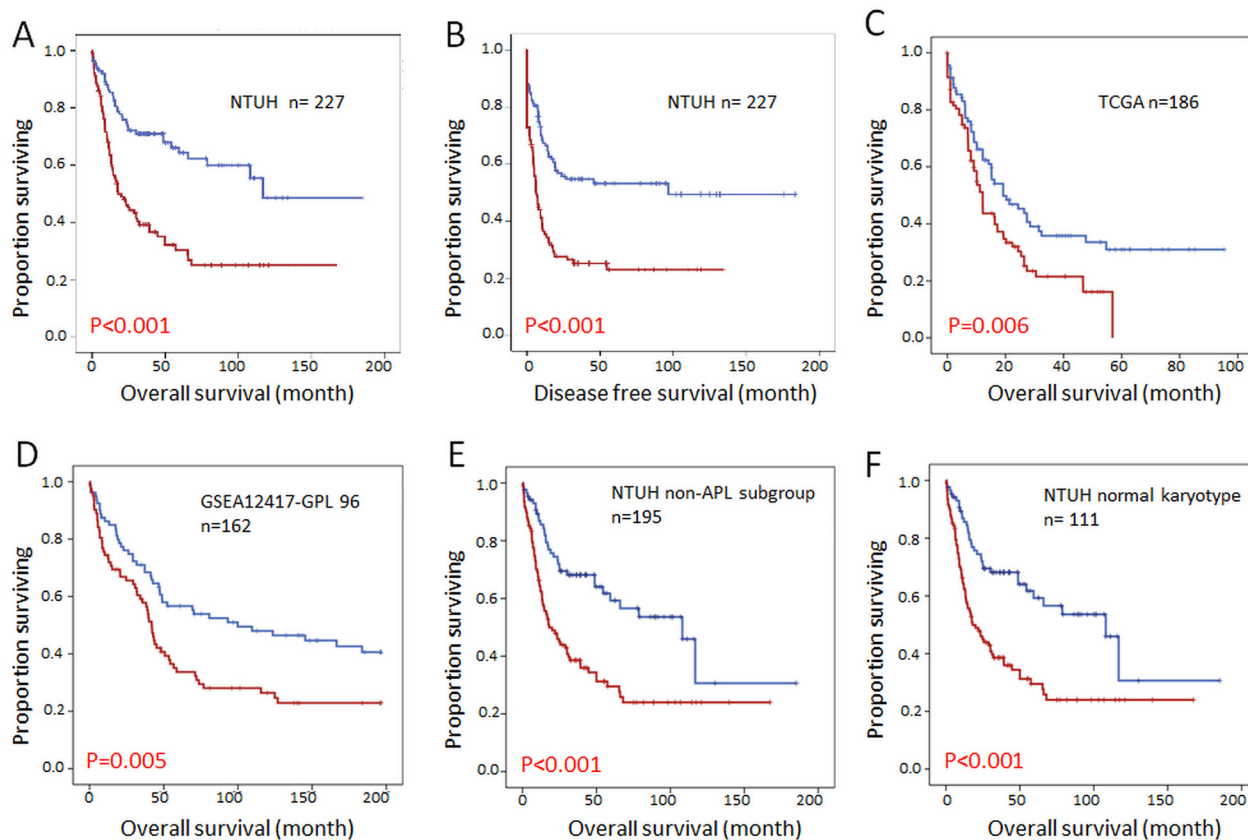

**Figure 2: Kaplan Meier survival curves for AML patients stratified by *DOCK1* expression levels. (A)** Overall survival in the NTUH cohort. **(B)** Disease free survival in the NTUH cohort. **(C)** Overall survival in the TCGA cohort. **(D)** Overall survival in the GSEA12417-GPL96 cohort. **(E)** Overall survival in non-APL patients from the NTUH cohort. **(F)** Overall survival in AML patients with normal karyotype from the NTUH cohort. Red line: higher *DOCK1* expression; blue line: lower *DOCK1* expression.

**Table 1: Comparison of clinical manifestations between AML patients with higher and lower BM *DOCK1* expression**

| Variables                             | Total (n=347) | <i>DOCK1</i> expression |                    | P value          |
|---------------------------------------|---------------|-------------------------|--------------------|------------------|
|                                       |               | Higher (n=174)          | Lower (n=173)      |                  |
| <b>Sex<sup>†</sup></b>                |               |                         |                    | 0.253            |
| Male                                  | 196           | 93                      | 103                |                  |
| Female                                | 151           | 81                      | 70                 |                  |
| <b>Age (year)<sup>‡</sup></b>         |               | 62 (15-89)              | 53 (16-91)         | <b>0.010</b>     |
| <b>Lab data</b>                       |               |                         |                    |                  |
| WBC (/μL) <sup>‡</sup>                |               | 24415 (890-423000)      | 18770 (380-417500) | 0.188            |
| Hemoglobin (g/dL) <sup>‡</sup>        |               | 8.1 (3.3-14.0)          | 8.1 (3.7-16.2)     | 0.441            |
| Platelet (×1,000/μL) <sup>‡</sup>     |               | 60 (7-655)              | 39 (2-493)         | <b>&lt;0.001</b> |
| Blast (/μL) <sup>‡</sup>              |               | 12325 (0-345964)        | 5080 (0-369070)    | <b>0.005</b>     |
| LDH (U/L) <sup>‡</sup>                |               | 897 (202-9097)          | 931 (242-13130)    | 0.412            |
| <b>FAB<sup>†</sup></b>                |               | 174                     | 173                | <b>&lt;0.001</b> |
| M0                                    | 9             | 4                       | 2                  | 0.414            |
| M1                                    | 67            | 35                      | 32                 | 0.703            |
| M2                                    | 109           | 54                      | 55                 | 0.879            |
| M3                                    | 28            | 1                       | 27                 | <b>&lt;0.001</b> |
| M4                                    | 103           | 62                      | 41                 | <b>0.015</b>     |
| M5                                    | 20            | 11                      | 9                  | 0.655            |
| M6                                    | 8             | 4                       | 4                  | 0.993            |
| Undetermined                          | 6             | 3                       | 3                  | 0.994            |
| <b>Induction response<sup>†</sup></b> | 227           | 114                     | 113                | <b>&lt;0.001</b> |
| CR <sup>†</sup>                       | 165 (72.7%)   | 70 (61.4%)              | 95 (84.1%)         | <b>&lt;0.001</b> |
| PR+ refractory <sup>†</sup>           | 47 (20.7%)    | 34 (29.8%)              | 13 (11.5%)         | <b>&lt;0.001</b> |
| Induction death <sup>†</sup>          | 15 (6.6%)     | 10 (8.8%)               | 5 (4.4%)           | 0.187            |
| <b>Relapse<sup>†</sup></b>            | 72 (31.7%)    | 40 (35.1%)              | 32 (28.3%)         | 0.273            |

<sup>†</sup>number of patients (%).

<sup>‡</sup>median (range).

Abbreviations: WBC, white blood cell count; FAB, French-American-British classification; CR, complete remission; PR, partial remission.

blast counts (p=0.005) at diagnosis than the lower expression group (Table 1). In addition, higher *DOCK1* expression level was closely associated with intermediate-risk cytogenetics (p=0.003) and normal karyotype (p=0.021), but inversely correlated with favorable karyotype, including t(8;21) and t(15:17) (all p<0.001) (Supplementary Table 4). Moreover, mutations in *CEBPA*, *KIT*, and *IDH2* occurred less often whilst *FLT3-ITD* and mutations in *PTPN11*, *MLL*, *NPM-1*, *RUNX1*, *ASXL1* and *DNMT3A* appeared more frequently in patients with higher *DOCK1* expression than in those with lower expression (Supplementary Table 5).

### Comparisons of prognostic significance of *DOCK1* expression with published prognostic gene signatures

To further evaluate the potential of *DOCK1* expression as a prognostic marker for AML, we compared the survival impact of *DOCK1* expression with other published gene expression-based prognostic signatures. We performed pairwise multivariate Cox analysis of *DOCK1* expression with each of the published 3-gene, [12] 7-gene, [13] 11-gene, [14] and 24-gene predictors [15]. Notably, *DOCK1* expression remained a prognostic

**Table 2: Multivariate Analysis (Cox regression) on the Overall Survival\***

| Variables                               | Overall survival |              |              |              |
|-----------------------------------------|------------------|--------------|--------------|--------------|
|                                         | HR               | 95% CI       |              | P value      |
|                                         |                  | Lower        | Upper        |              |
| <b>Total cohort (n=227)</b>             |                  |              |              |              |
| Age                                     | 1.014            | 1.001        | 1.027        | 0.036        |
| WBC                                     | 1.000            | 1.000        | 1.000        | 0.036        |
| Unfavorable cytogenetics                | 2.672            | 1.484        | 4.809        | 0.001        |
| <i>FLT3</i> -ITD                        | 1.320            | 0.840        | 2.073        | 0.229        |
| <i>CEBPA</i> <sup>double mutation</sup> | 0.331            | 0.131        | 0.837        | 0.019        |
| <i>RUNX1</i> mutation                   | 1.279            | 0.718        | 2.275        | 0.403        |
| <i>MLL</i> -PTD                         | 1.636            | 0.729        | 3.620        | 0.225        |
| <i>WT1</i> mutation                     | 1.827            | 1.022        | 3.267        | 0.042        |
| <i>TP53</i> mutation                    | 3.838            | 1.416        | 10.402       | 0.008        |
| <b><i>DOCK1</i> higher expression</b>   | <b>1.501</b>     | <b>1.127</b> | <b>1.998</b> | <b>0.005</b> |

\*The model was generated from a stepwise Cox regression model that included age, WBC, unfavorable cytogenetics, gene mutations of *FLT3*, *WT1*, *CEBPA*, *RUNX1*, *MLL*, *TP53* and expression level of *DOCK1*.

Abbreviations: HR, hazard ratio; CI, confidence interval; WBC, white blood cell count.

**Table 3: Comparisons of *DOCK1* expression to published prognostic gene signatures**

| Predictor                      | NTUH (n=227)               | TCGA (n=186)            | GSE12417 (n=162)       |
|--------------------------------|----------------------------|-------------------------|------------------------|
| <i>DOCK1</i>                   | <0.001* (1.50;1.27-1.76)** | 0.001 (1.73;1.26-2.37)  | 0.001 (1.34;1.12-1.60) |
| 3-gene score (Wilop et al.)    | 0.010 (1.34;1.07-1.68)     | 0.003 (1.37;1.11-1.69)  | 0.194 (1.15;0.93-1.42) |
| <i>DOCK1</i>                   | <0.001 (1.43;1.20-1.70)    | 0.003 (1.66;1.19-2.31)  | 0.008 (1.28;1.07-1.55) |
| 7-gene score (Marcucci et al.) | 0.003 (1.19;1.06-1.34)     | 0.092 (1.10;0.98-1.22)  | 0.031 (1.19;1.02-1.38) |
| <i>DOCK1</i>                   | 0.001 (1.39;1.15-1.67)     | 0.005 (1.68;1.17-2.41)  | 0.146 (1.17;0.95-1.44) |
| 11-gene score (Chuang et al.)  | 0.007 (1.05;1.01-1.09)     | 0.337 (1.02;0.98-1.07)  | 0.004 (1.06;1.02-1.11) |
| <i>DOCK1</i>                   | 0.004 (1.36;1.11-1.68)     | 0.034 (1.43;1.03-2.00)  | 0.023 (1.32;1.04-1.68) |
| 24-gene score (Li et al.)      | 0.029 (1.07;1.01-1.13)     | <0.001 (1.11;1.05-1.18) | 0.493 (1.02;0.97-1.07) |

\*Pairwise multivariate P-value (\*\*hazard ratio; 95% confidence interval of hazard ratio).

factor independent to all these composite signatures (with multivariate Cox  $p < 0.05$ ) and achieved even higher significance in most of the comparison settings (10 out of 12; Table 3). Considering that these signatures were originally developed by diverse study designs in multiple AML cohorts, our data suggested *DOCK1* expression as a simple, powerful, and widely applicable prognostic marker.

### Functional enrichment analysis of *DOCK1*

We conducted functional enrichment analysis to gain biological insights into the underlying mechanisms of unfavorable prognosis related to *DOCK1* over-

expression. The up-regulation of *DOCK1* in HSC cells (Figure 1B) implied its role in stem cell biology in AML. To test this hypothesis, we curated two published stem cell gene signatures [16, 17]. GSEA analysis showed concordant up-regulation of HSC and leukemic stem cell (LSC)-associated genes (Supplementary Table 6 and Supplementary Table 7) in patients with higher *DOCK1* expression (GSEA  $p < 0.001$  and  $p = 0.004$ , respectively; Figure 3A). Furthermore, GSEA revealed a concordant enrichment of homeobox genes (Supplementary Table 8,  $p < 0.001$ ; Figure 3A), indicating the association of *DOCK1* in stem cell functions as homeobox genes are well-known central player in determining stem cell fate [18].

*DOCK1* is known to interact physically with *ELMO1*, a mediator of chemotaxis in AML, with an implication in cell migration [2, 3]. We reasoned that the adverse effect of higher *DOCK1* expression in prognosis might be mediated by this axis. To verify this, we manually curated a signature of *ELMO1*-interacting genes (Supplementary Table 9) to measure its activity and ran another GSEA analysis. Indeed, the *ELMO1* signature was positively associated with *DOCK1* overexpression ( $p=0.012$ ; Figure 3A). DAVID analysis confirmed the association between 321 differentially expressed probes between *DOCK1*-high and *DOCK1*-low patients (Supplementary Table 10) (with  $t$ -test  $p<0.05$  and  $>1.5$ -fold change between *DOCK1*-high and -low patients) and functions involved in chemotaxis and cell migration-related functions, cell proliferation, and apoptosis (modified Fisher's exact test  $p$ -values $<0.05$ ; Figure 3B). Overall, our data implied the involvement of *DOCK1* in chemotaxis and migration in hematopoietic cells, at least partially accounting for unfavorable survival in AML patients with higher *DOCK1* expression. Further biological investigations are needed to delineate the underlying mechanisms.

## DISCUSSION

While *DOCK* proteins have pleiotropic functions in immunity, neurology, cytokinesis, and motility, their functions in hematopoietic system and prognostic

significance in AML are totally unknown. In this study, we addressed these questions by analyzing the expression patterns of the 11 *DOCK* member genes in normal hematopoietic and AML cells. The data were extracted from ours and other public databases. Our analyses focused on *DOCK1* since it was the only one in the family with prognostic significance. The finding can be validated in other independent cohorts.

*DOCK1* protein is involved in the regulation of actin cytoskeleton and cell motility [2]. The dysregulation of these molecules may be responsible for invasive and metastatic properties of cancer cells [9, 10, 19]. *DOCK1* gene expression carries prognostic significance in breast cancer, ovarian cancer and glioblastoma multiforme through activation of c-JUN, STAT3, and Rac1 [9, 10, 19]. Given these findings in solid cancers, the role of *DOCK1* protein in AML remains unexplored. To the best of our knowledge, the current study is the first to report the clinical implication of *DOCK* gene expression in AML. *DOCK1* gene seems to be a special *DOCK* member because of its unique enrichment in HSC and adverse prognostic impact in AML.

The mechanisms underlying poor prognostic implication of higher *DOCK1* expression in AML remain to be explored. Our bioinformatics approach revealed *DOCK1* overexpression coincided with some of its known functions such as cell migration, motion, and chemotaxis in AML cells (Supplementary Table 10). HIF-1 $\alpha$  [20,

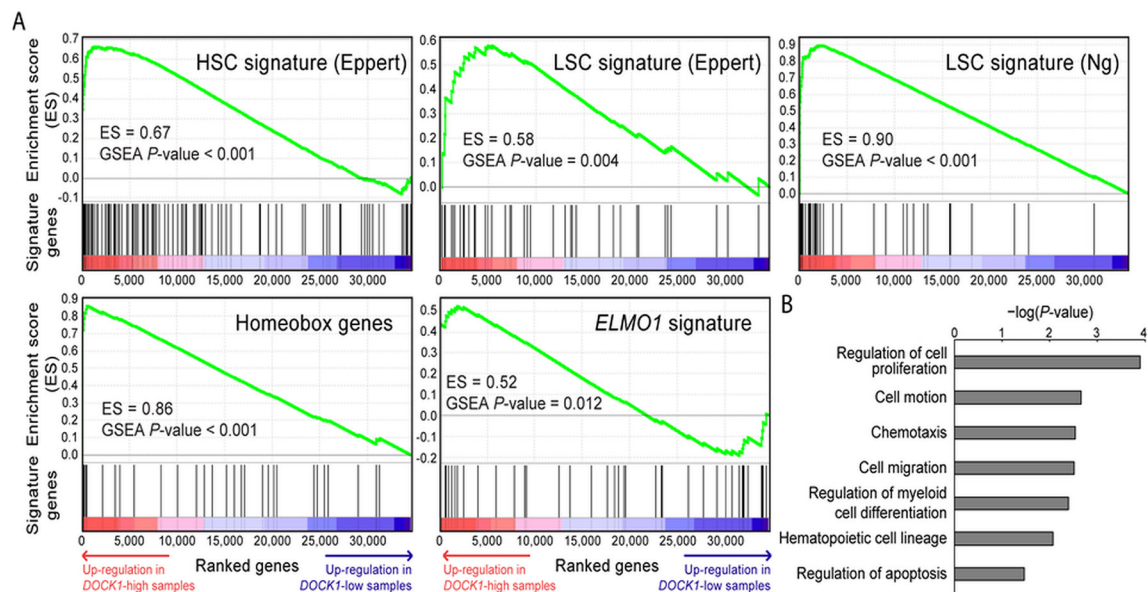

**Figure 3: Functional enrichment analysis of *DOCK1* in AML. (A)** GSEA enrichment plots. GSEA sorted genome-wide genes by the significance of differential expression between patients with higher and lower *DOCK1* expressions (denoted by red and indigo arrows) in the NTUH cohort. Each set of genes was tested for an enrichment (measured by an enrichment score and permutation-based p-value) at either side of the list. Four gene sets were analyzed, including gene signatures of HSC and LSC, described previously by Eppert et al [16] and Ng et al [17], respectively and our manually curated *ELMO1*-interacting genes and Homeobox genes. All of these gene sets showed significant enrichment in samples with *DOCK1* up regulation. **(B)** Functions and pathways of *DOCK1* in the NTUH cohort. We used the DAVID web tool to analyze associated functions and pathways of 321 probes differentially expressed between *DOCK1*-high and -low patients. DAVID-generated modified Fisher's exact test p-values of selected genes terms are represented in log-10 scale.

21] and CXCR4, two factors related to cell motion and chemotaxis, have been reported as unfavorable prognostic markers for AML [22, 23]. The analysis of microarray data exhibited significant correlation of the expression of *DOCK1* with that of *HIF-1 $\alpha$*  and *CXCR4* in our cohort (data not shown). This was consistent with previous study in which knock down of *ELMO1*, the partner gene of *DOCK1*, resulted in reduced chemotaxis of leukemia cells [3].

We showed that *DOCK1* was associated with both HSC and LSC signatures. Since stemness is an established property pertaining to drug resistance and poor prognosis in cancer patients, [24] these data provided an explanation for the unfavorable prognostic impact of *DOCK1* over-expression in AML. We compared the prognostic significance of *DOCK1* expression to several published multi-gene signatures originally derived from a wide range of molecular mechanisms (e.g., epigenetic changes and chemoresistance genes) and cohorts with different cytogenetic subtypes and races. The comparisons were performed among datasets from both cytogenetically normal (GSE12417) and cytogenetically heterogeneous AML patients (NTUH and TCGA) (Table 3). The promising performance of *DOCK1* expression reinforces its potential as a simple and powerful prognostic marker that seems to be independent of cytogenetic abnormalities, but further studies are necessary to confirm it.

We noted that the three datasets analyzed in this study were derived from different profiling platforms. Probe-wise z-transformation was thus performed to each dataset in order to eliminate cross-platform and cross-cohort biases. For simplicity, in this study we adopted a median of *DOCK1* expression as a cutoff level. For clinical practice, a receiver operating characteristic (ROC) analysis of 2-year survival in the NTUH dataset suggested an optimal cutoff at 0.625 (z-transformed expression of *DOCK1*, or, if multiple probes exist, average of z-transformed expression of all probes of *DOCK1*). The cutoff achieved significant differences in survival curves in the three datasets (all p-values<0.001) and warrants further testing by a large prospective study.

In summary, our study concluded that the overexpression of *DOCK1* as an unfavorable prognostic marker in acute myeloid leukemia possibly through its correlation with stemness, cell proliferation, motility and chemotaxis. Current study focused on the clinical and bioinformatics analyses on the prognostic and biological impacts of *DOCK1* in AML. Prospective studies are warranted to confirm our observation. Moreover, further mechanistic studies are necessary to delineate how *DOCK1* participates in the stem cell biology of hematopoietic lineages and its role in modulating unfavorable prognostic impact in AML.

## MATERIALS AND METHODS

### Patients

We recruited 347 adult patients with newly diagnosed AML at the National Taiwan University Hospital (NTUH) from 1995 to 2011. Among them, 227 patients underwent standard intensive chemotherapy as described previously [25]. We obtained written informed consent from each patient in accordance with Declaration of Helsinki. This study was approved by the Research Ethics Committee of the National Taiwan University Hospital.

### Cytogenetic and mutation analyses

Cytogenetic risk was defined according to the European Leukemia Net (ELN) guideline [26]. Analyses of genetic mutations including *FTL3*-ITD, *FTL3*-TKD, *NPM1*, *MLL*-PTD, *NRAS*, *KRAS*, *PTPN11*, *KIT*, *JAK2*, *WT1*, *CEBPA*, *RUNX1*, *ASXL1*, *IDH1*, *IDH2*, *TET2* and *DNTM3A* mutations were carried out in bone marrow mononuclear cells obtained at diagnosis as described previously [27–31].

### High-throughput mRNA assay and data analysis

Illumina HumanHT-12 v4 Expression BeadChips (Illumina, Inc., San Diego, CA) were utilized to profile global gene expression of bone marrow cells from the 347 AML patients as previously described (GEO accession numbers: GSE68469 and GSE71014) [14, 32, 33]. Expression of *DOCK1* was analyzed in binomial manner with a median cutoff to ensure balance comparison, as in previous literatures [13, 15, 32]. To confirm the prognostic implication of *DOCK1* in our cohort, we incorporated publicly available gene expression microarray datasets from two independent AML cohorts, The Cancer Genome Atlas (TCGA; n=186) [34] and GSE12417 (n=162) [35]. The RNA-Seq dataset of the TCGA cohort (n=179) was also utilized in this study which was represented in RPKM (reads per kilobase of transcript per million mapped reads) counts. All microarray data were converted to the log-2 scale if not performed originally. Probe expression levels were transformed to z-values (subtraction of probe mean and division by probe standard deviation) and averaged into gene-level data.

### Functional enrichment analysis

Differentially expressed genes associated with the gene of interest (i.e., *DOCK1*) were analyzed by the Database for Annotation, Visualization and Integrated Discovery (DAVID) [36, 37] for related functions, such as Gene Ontology terms and biological pathways, with default settings. We also utilized the Gene Set

Enrichment Analysis (GSEA) [38] to investigate the association between expression profile of the gene and other biological functions or gene signatures. Briefly, previously published or our manually curated gene signatures were collected and tested for enrichment in a genome-wide gene list, which was sorted by the significance of differential expression between patients with highest (>3<sup>rd</sup> quartile) and lowest (<1<sup>st</sup> quartile) expression of the gene. We adopted default GSEA settings and the significance of an enrichment score was evaluated by a permutation test with respect to genes.

### Statistical analysis

Statistical analysis was generated using SPSS software 21.0. We first examine the normality of array parameter with Shapiro-Wilk test. Non-parametric variables were analyzed with Mann-Whitney test while nominal parameters were compared by Chi-square test. The overall survival (OS) was calculated and plotted with the use of Kaplan-Meier curves from the date of first diagnosis to date of last follow-up or death from any cause. The disease free survival (DFS) was measured from the date of primary treatment to the date of disease relapse or death from any cause. Log-rank test was utilized to determine statistical significance. Whole patient cohort (n=347) was included in the analysis of association between *DOCK* expression levels and clinical characteristics yet only the 227 of them who received standard chemotherapy were included for survival analyses. The prognostic significance of parameters such as age, white blood cell counts, CD34 expression, mutation status of the afore-mentioned 16 genes and expression levels of *DOCK1* were first evaluated individually in univariate analysis and the significant factors were then examined together with multivariate analysis using Cox regression. Level of significance was set at  $p < 0.05$ .

### Authors' contributions

Conception and design: WC Chou, HF Tien, YC Chiu.

Acquisition of data (provided animals, acquired and managed patients, provided facilities, etc.): CC Lin, HA Hou, YC Chiu, YH Li.

Analysis and interpretation of data (e.g., statistical analysis, biostatistics, computational analysis): SH Lee, YC Chiu.

Writing, review, and/or revision of the manuscript: WC Chou, HF Tien, SH Lee, YC Chiu.

Administrative, technical, or material support (i.e., reporting or organizing data, constructing databases): CC Lin, SH Lee, YC Chiu, YH Li.

Study supervision: WC Chou, HF Tien.

### CONFLICTS OF INTEREST

All authors have no conflicts of interest to declare.

### FUNDING

The study was supported by a National Taiwan University Hospital-National Taiwan University joint research grant (UN103-051), Ministry of Science and Technology of Taiwan (MOST102-2325-B-002-028, 103-2314-B-002-130-MY3, 103-2314-B-002-131MY3 and 104-2923-B-002-001), and Ministry of Health and Welfare of Taiwan (MOHW102-TD-C-111-001 and MOHW103-TD-B-111-04).

### REFERENCES

1. Gadea G, Blangy A. Dock-family exchange factors in cell migration and disease. *European journal of cell biology*. 2014; 93:466-477.
2. Cote JF, Vuori K. GEF what? Dock180 and related proteins help Rac to polarize cells in new ways. *Trends in cell biology*. 2007; 17:383-393.
3. Capala ME, Vellenga E, Schuringa JJ. ELMO1 is upregulated in AML CD34+ stem/progenitor cells, mediates chemotaxis and predicts poor prognosis in normal karyotype AML. *PLoS one*. 2014; 9:e111568.
4. Wu M, Hamaker M, Li L, Small D, Duffield AS. DOCK2 interacts with FLT3 and modulates the survival of FLT3-expressing leukemia cells. *Leukemia*. 2016.
5. Sundaravel S, Duggan R, Bhagat T, Ebenezer DL, Liu H, Yu Y, Bartenstein M, Unnikrishnan M, Karmakar S, Liu TC, Torregroza I, Quenon T, Anastasi J, McGraw KL, Pellagatti A, Boultonwood J, et al. Reduced DOCK4 expression leads to erythroid dysplasia in myelodysplastic syndromes. *Proceedings of the National Academy of Sciences of the United States of America*. 2015; 112:E6359-6368.
6. Brazier H, Stephens S, Ory S, Fort P, Morrison N, Blangy A. Expression profile of RhoGTPases and RhoGEFs during RANKL-stimulated osteoclastogenesis: identification of essential genes in osteoclasts. *Journal of bone and mineral research: the official journal of the American Society for Bone and Mineral Research*. 2006; 21:1387-1398.
7. Nishikimi A, Kukimoto-Niino M, Yokoyama S, Fukui Y. Immune regulatory functions of DOCK family proteins in health and disease. *Experimental cell research*. 2013; 319:2343-2349.
8. Shi L. Dock protein family in brain development and neurological disease. *Communicative & integrative biology*. 2013; 6:e26839.
9. Laurin M, Huber J, Pelletier A, Houalla T, Park M, Fukui Y, Haibe-Kains B, Muller WJ, Cote JF. Rac-specific guanine nucleotide exchange factor DOCK1 is a critical regulator of HER2-mediated breast cancer metastasis. *Proceedings of*



the National Academy of Sciences of the United States of America. 2013; 110:7434-7439.

10. Zhao F, Siu MK, Jiang L, Tam KF, Ngan HY, Le XF, Wong OG, Wong ES, Chan HY, Cheung AN. Overexpression of dedicator of cytokinesis I (Dock180) in ovarian cancer correlated with aggressive phenotype and poor patient survival. *Histopathology*. 2011; 59:1163-1172.
11. Feng H, Hu B, Vuori K, Sarkaria JN, Furnari FB, Cavenee WK, Cheng SY. EGFRvIII stimulates glioma growth and invasion through PKA-dependent serine phosphorylation of Dock180. *Oncogene*. 2014; 33:2504-2512.
12. Wilop S, Chou WC, Jost E, Crysandt M, Panse J, Chuang MK, Brummendorf TH, Wagner W, Tien HF, Kharabi Masouleh B. A three-gene expression-based risk score can refine the European LeukemiaNet AML classification. *Journal of hematology & oncology*. 2016; 9:78.
13. Marcucci G, Yan P, Maharry K, Frankhouser D, Nicolet D, Metzeler KH, Kohlschmidt J, Mrozek K, Wu YZ, Bucci D, Curfman JP, Whitman SP, Eisfeld AK, Mandler JH, Schwind S, Becker H, et al. Epigenetics meets genetics in acute myeloid leukemia: clinical impact of a novel seven-gene score. *Journal of clinical oncology: official journal of the American Society of Clinical Oncology*. 2014; 32:548-556.
14. Chuang MK, Chiu YC, Chou WC, Hou HA, Tseng MH, Kuo YY, Chen Y, Chuang EY, Tien HF. An mRNA expression signature for prognostication in de novo acute myeloid leukemia patients with normal karyotype. *Oncotarget*. 2015; 6:39098-39110.
15. Li Z, Herold T, He C, Valk PJ, Chen P, Jurinovic V, Mansmann U, Radmacher MD, Maharry KS, Sun M, Yang X, Huang H, Jiang X, Sauerland MC, Buchner T, Hiddemann W, et al. Identification of a 24-gene prognostic signature that improves the European LeukemiaNet risk classification of acute myeloid leukemia: an international collaborative study. *Journal of clinical oncology: official journal of the American Society of Clinical Oncology*. 2013; 31:1172-1181.
16. Eppert K, Takenaka K, Lechman ER, Waldron L, Nilsson B, van Galen P, Metzeler KH, Poepl A, Ling V, Beyene J, Canty AJ, Danska JS, Bohlander SK, Buske C, Minden MD, Golub TR, et al. Stem cell gene expression programs influence clinical outcome in human leukemia. *Nature medicine*. 2011; 17:1086-1093.
17. Ng SW, Mitchell A, Kennedy JA, Chen WC, McLeod J, Ibrahimova N, Arruda A, Popescu A, Gupta V, Schimmer AD, Schuh AC, Yee KW, Bullinger L, Herold T, Gorlich D, Buchner T, et al. A 17-gene stemness score for rapid determination of risk in acute leukaemia. *Nature*. 2016; 540:433-437.
18. Seifert A, Werheid DF, Knapp SM, Tobiasch E. Role of Hox genes in stem cell differentiation. *World journal of stem cells*. 2015; 7:583-595.
19. Feng H, Hu B, Liu KW, Li Y, Lu X, Cheng T, Yiin JJ, Lu S, Keezer S, Fenton T, Furnari FB, Hamilton RL, Vuori K, Sarkaria JN, Nagane M, Nishikawa R, et al. Activation of Rac1 by Src-dependent phosphorylation of Dock180(Y1811) mediates PDGFRalpha-stimulated glioma tumorigenesis in mice and humans. *The Journal of clinical investigation*. 2011; 121:4670-4684.
20. Migliavacca J, Percio S, Valsecchi R, Ferrero E, Spinelli A, Ponzoni M, Tresoldi C, Pattini L, Bernardi R, Coltella N. Hypoxia inducible factor-1a regulates a pro-invasive phenotype in acute monocytic leukemia. *Oncotarget*. 2016.
21. Deeb G, Vaughan MM, McInnis I, Ford LA, Sait SN, Starostik P, Wetzler M, Mashtare T, Wang ES. Hypoxia-inducible factor-1alpha protein expression is associated with poor survival in normal karyotype adult acute myeloid leukemia. *Leukemia research*. 2011; 35:579-584.
22. Peled A, Tavor S. Role of CXCR4 in the pathogenesis of acute myeloid leukemia. *Theranostics*. 2013; 3:34-39.
23. Spoo AC, Lubbert M, Wierda WG, Burger JA. CXCR4 is a prognostic marker in acute myelogenous leukemia. *Blood*. 2007; 109:786-791.
24. Dean M, Fojo T, Bates S. Tumour stem cells and drug resistance. *Nature reviews Cancer*. 2005; 5:275-284.
25. Chou WC, Tang JL, Lin LI, Yao M, Tsay W, Chen CY, Wu SJ, Huang CF, Chiou RJ, Tseng MH, Lin DT, Lin KH, Chen YC, Tien HF. Nucleophosmin mutations in de novo acute myeloid leukemia: the age-dependent incidences and the stability during disease evolution. *Cancer research*. 2006; 66:3310-3316.
26. Mrozek K, Marcucci G, Nicolet D, Maharry KS, Becker H, Whitman SP, Metzeler KH, Schwind S, Wu YZ, Kohlschmidt J, Pettenati MJ, Heerema NA, Block AW, Patil SR, Baer MR, Kolitz JE, et al. Prognostic significance of the European LeukemiaNet standardized system for reporting cytogenetic and molecular alterations in adults with acute myeloid leukemia. *Journal of clinical oncology: official journal of the American Society of Clinical Oncology*. 2012; 30:4515-4523.
27. Hou HA, Chou WC, Kuo YY, Liu CY, Lin LI, Tseng MH, Chiang YC, Liu MC, Liu CW, Tang JL, Yao M, Li CC, Huang SY, Ko BS, Hsu SC, Chen CY, et al. TP53 mutations in de novo acute myeloid leukemia patients: longitudinal follow-ups show the mutation is stable during disease evolution. *Blood cancer journal*. 2015; 5:e331.
28. Chou WC, Lei WC, Ko BS, Hou HA, Chen CY, Tang JL, Yao M, Tsay W, Wu SJ, Huang SY, Hsu SC, Chen YC, Chang YC, Kuo KT, Lee FY, Liu MC, et al. The prognostic impact and stability of Isocitrate dehydrogenase 2 mutation in adult patients with acute myeloid leukemia. *Leukemia*. 2011; 25:246-253.
29. Chou WC, Chou SC, Liu CY, Chen CY, Hou HA, Kuo YY, Lee MC, Ko BS, Tang JL, Yao M, Tsay W, Wu SJ, Huang SY, Hsu SC, Chen YC, Chang YC, et al. TET2 mutation is an unfavorable prognostic factor in acute myeloid leukemia patients with intermediate-risk cytogenetics. *Blood*. 2011; 118:3803-3810.

30. Chou WC, Hou HA, Chen CY, Tang JL, Yao M, Tsay W, Ko BS, Wu SJ, Huang SY, Hsu SC, Chen YC, Huang YN, Chang YC, Lee FY, Liu MC, Liu CW, et al. Distinct clinical and biologic characteristics in adult acute myeloid leukemia bearing the isocitrate dehydrogenase 1 mutation. *Blood*. 2010; 115:2749-2754.
31. Chou WC, Huang HH, Hou HA, Chen CY, Tang JL, Yao M, Tsay W, Ko BS, Wu SJ, Huang SY, Hsu SC, Chen YC, Huang YN, Chang YC, Lee FY, Liu MC, et al. Distinct clinical and biological features of de novo acute myeloid leukemia with additional sex comb-like 1 (ASXL1) mutations. *Blood*. 2010; 116:4086-4094.
32. Chuang MK, Chiu YC, Chou WC, Hou HA, Chuang EY, Tien HF. A 3-microRNA scoring system for prognostication in de novo acute myeloid leukemia patients. *Leukemia*. 2015; 29:1051-1059.
33. Chiu YC, Tsai MH, Chou WC, Liu YC, Kuo YY, Hou HA, Lu TP, Lai LC, Chen Y, Tien HF, Chuang EY. Prognostic significance of NPM1 mutation-modulated microRNA-mRNA regulation in acute myeloid leukemia. *Leukemia*. 2016; 30:274-284.
34. Cancer Genome Atlas Research N. Genomic and epigenomic landscapes of adult de novo acute myeloid leukemia. *The New England journal of medicine*. 2013; 368:2059-2074.
35. Metzeler KH, Hummel M, Bloomfield CD, Spiekermann K, Braess J, Sauerland MC, Heinecke A, Radmacher M, Marcucci G, Whitman SP, Maharry K, Paschka P, Larson RA, Berdel WE, Buchner T, Wormann B, et al. An 86-probe-set gene-expression signature predicts survival in cytogenetically normal acute myeloid leukemia. *Blood*. 2008; 112:4193-4201.
36. Huang da W, Sherman BT, Lempicki RA. Systematic and integrative analysis of large gene lists using DAVID bioinformatics resources. *Nat Protoc*. 2009; 4:44-57.
37. Huang da W, Sherman BT, Lempicki RA. Bioinformatics enrichment tools: paths toward the comprehensive functional analysis of large gene lists. *Nucleic Acids Res*. 2009; 37:1-13.
38. Subramanian A, Tamayo P, Mootha VK, Mukherjee S, Ebert BL, Gillette MA, Paulovich A, Pomeroy SL, Golub TR, Lander ES, Mesirov JP. Gene set enrichment analysis: a knowledge-based approach for interpreting genome-wide expression profiles. *Proceedings of the National Academy of Sciences of the United States of America*. 2005; 102:15545-15550.
